# Supplementary material for: Plasma Levels of Free NƐ-Carboxymethyllysine (CML) after Different Oral Doses of CML in Rats and after the Intake of Different Breakfasts in Humans: Postprandial Plasma Level of sRAGE in Humans
Source: MDPI journal article supplement (doi:10.3390/nu14091890), 2022-04-30
Supplement: s1 [file s1]

## Supplementary Information (SI)

### Article

# Plasma Levels of Free *N*<sup>ε</sup>-Carboxymethyllysine (CML) after Different Oral Doses of CML in Rats and after the Intake of Different Breakfasts in Humans: Postprandial Plasma Level of sRAGE in Humans

Cynthia Helou <sup>1,†</sup>, Matheus Thomaz Nogueira Silva Lima <sup>2,†</sup>, Céline Niquet-Leridon <sup>3</sup>, Philippe Jacolot <sup>3</sup>, Eric Boulanger <sup>2</sup>, Florian Delguste <sup>2</sup>, Axel Guilbaud <sup>2</sup>, Michael Genin <sup>4</sup>, Pauline M. Anton <sup>3</sup>, Carine Delayre-Orthez <sup>3</sup>, Tatiana Papazian <sup>1</sup>, Michael Howsam <sup>2</sup> and Frédéric J. Tessier <sup>2,\*</sup>

<sup>1</sup> Department of Nutrition, Faculty of Pharmacy, Saint Joseph University of Beirut, Beirut 1004 2020, Lebanon; cynthia.helou@usj.edu.lb (C.H.); tatiana.wahanian@usj.edu.lb (T.P.)

<sup>2</sup> U1167—RID—AGE—Facteurs de Risque et Déterminants Moléculaires des Maladies Liées au Vieillessement, Institut Pasteur de Lille, University Lille, Inserm, CHU Lille, F-59000 Lille, France; matheusthomaz.nogueirasilvalima@univ-lille.fr (M.T.N.S.L.); eric.boulanger@univ-lille.fr (E.B.); florian.delguste@gmail.com (F.D.); axel.guilbaud@gmail.com (A.G.); michael.howsam@univ-lille.fr (M.H.)

<sup>3</sup> ULR 7519, Equipe PETALES, Institut Polytechnique UniLaSalle, Université d'Artois, F-60026 Beauvais, France; celine.leridon@unilasalle.fr (C.N.-L.); philipe.jacolot@unilasalle.fr (P.J.); pauline.anton@unilasalle.fr (P.M.A.); carine.delayre@unilasalle.fr (C.D.-O.)

<sup>4</sup> ULR 2694-METRICS: Évaluation des Technologies de Santé et des Pratiques Médicales, University Lille, Inserm, CHU Lille, F-59000 Lille, France; michael.genin@univ-lille.fr

\* Correspondence: frederic.tessier@univ-lille.fr; Tel.: +33-(0)3-2062-3561

† These authors contributed equally to this work.

### This PDF file includes:

**Table S1.** List of standard methods applied for analysis of calories, fat, carbohydrates, protein, ash, moisture, minerals, and vitamins.

|                                                    | Method                                                                                                                                                                                                                                                                                                                                                                      |
|----------------------------------------------------|-----------------------------------------------------------------------------------------------------------------------------------------------------------------------------------------------------------------------------------------------------------------------------------------------------------------------------------------------------------------------------|
| <b>Fat content</b>                                 | AOAC 945.48, 933.05 & 963.15                                                                                                                                                                                                                                                                                                                                                |
| <b>Calories from fat</b>                           | For calorie conversion, calorie values were calculated based on the total grams of fat equivalent to 9 kcal/g.                                                                                                                                                                                                                                                              |
| <b>Saturated fatty acids</b>                       | Fatty Acid Profile (saturated, unsaturated, trans):<br>Hoteit, M., Zoghbi, E., Rady, A., Shankiti, I., & Al-Jawaldeh, A. (2021). Fatty acids quality in middle east-ern traditional dishes, arabic sweets and market foods frequently consumed in Lebanon. <i>Nutrients</i> , 13(7).<br><a href="https://doi.org/10.3390/nu13072462">https://doi.org/10.3390/nu13072462</a> |
| <b>Monounsaturated fatty acids</b>                 |                                                                                                                                                                                                                                                                                                                                                                             |
| <b>Polyunsaturated fatty acids</b>                 |                                                                                                                                                                                                                                                                                                                                                                             |
| <b>Trans fat</b>                                   |                                                                                                                                                                                                                                                                                                                                                                             |
| <b>Carbohydrates (including sugars and fibers)</b> | Carbohydrates were calculated by subtracting the sum of the percentages of the measured weights of fat, protein, moisture, and ash from the total weight (100g)                                                                                                                                                                                                             |
| <b>Total sugars</b>                                | AOAC 906.03, 930.36 and 975.15                                                                                                                                                                                                                                                                                                                                              |
| <b>Total dietary fibers</b>                        | AOAC 985.29                                                                                                                                                                                                                                                                                                                                                                 |
| <b>Crude fibers</b>                                | AOAC 962.09                                                                                                                                                                                                                                                                                                                                                                 |
| <b>Protein (N x 6.25)</b>                          | AOAC 991.20-23 crude protein was calculated through the multiplication of total Kjeldahl nitrogen by 6.25                                                                                                                                                                                                                                                                   |
| <b>Ash content</b>                                 | Ash content is determined by incineration in an Isotemp muffle furnace at 550°C overnight                                                                                                                                                                                                                                                                                   |
| <b>Moisture content</b>                            | The food samples were heated to 105°C (Fisher Isotemp vacuum oven) and the measurement of moisture content was based on the loss of weight of the sample.                                                                                                                                                                                                                   |
| <b>Caloric value</b>                               | For calorie conversion, calorie values were calculated based on the total grams of protein, carbohydrate, and fat equivalent of 4, 4, and 9 kcal/g, respectively.                                                                                                                                                                                                           |
| <b>Iron</b>                                        | AOAC 985.35                                                                                                                                                                                                                                                                                                                                                                 |
| <b>Sodium</b>                                      | AOAC 985.35                                                                                                                                                                                                                                                                                                                                                                 |
| <b>Calcium</b>                                     | AOAC 985.35                                                                                                                                                                                                                                                                                                                                                                 |
| <b>Vitamin C</b>                                   | AOAC 967.21-1968                                                                                                                                                                                                                                                                                                                                                            |
| <b>Vitamin E</b>                                   | NF-EN 12822                                                                                                                                                                                                                                                                                                                                                                 |
